# Supplementary material for: Purification of nanogram-range immunoprecipitated DNA in ChIP-seq application
Source: PubMed Central journal article supplement (PMC5740926; doi:10.1186/s12864-017-4371-5), 2017-12-21

Additional file 1

A

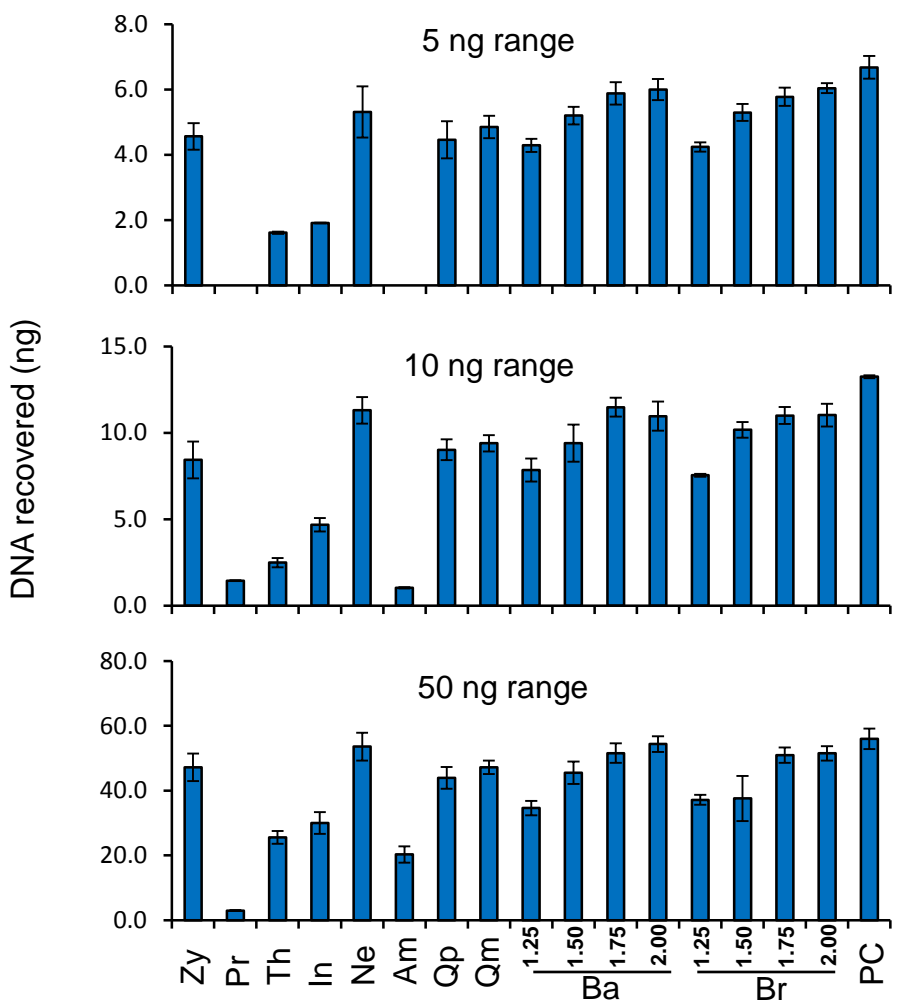

B

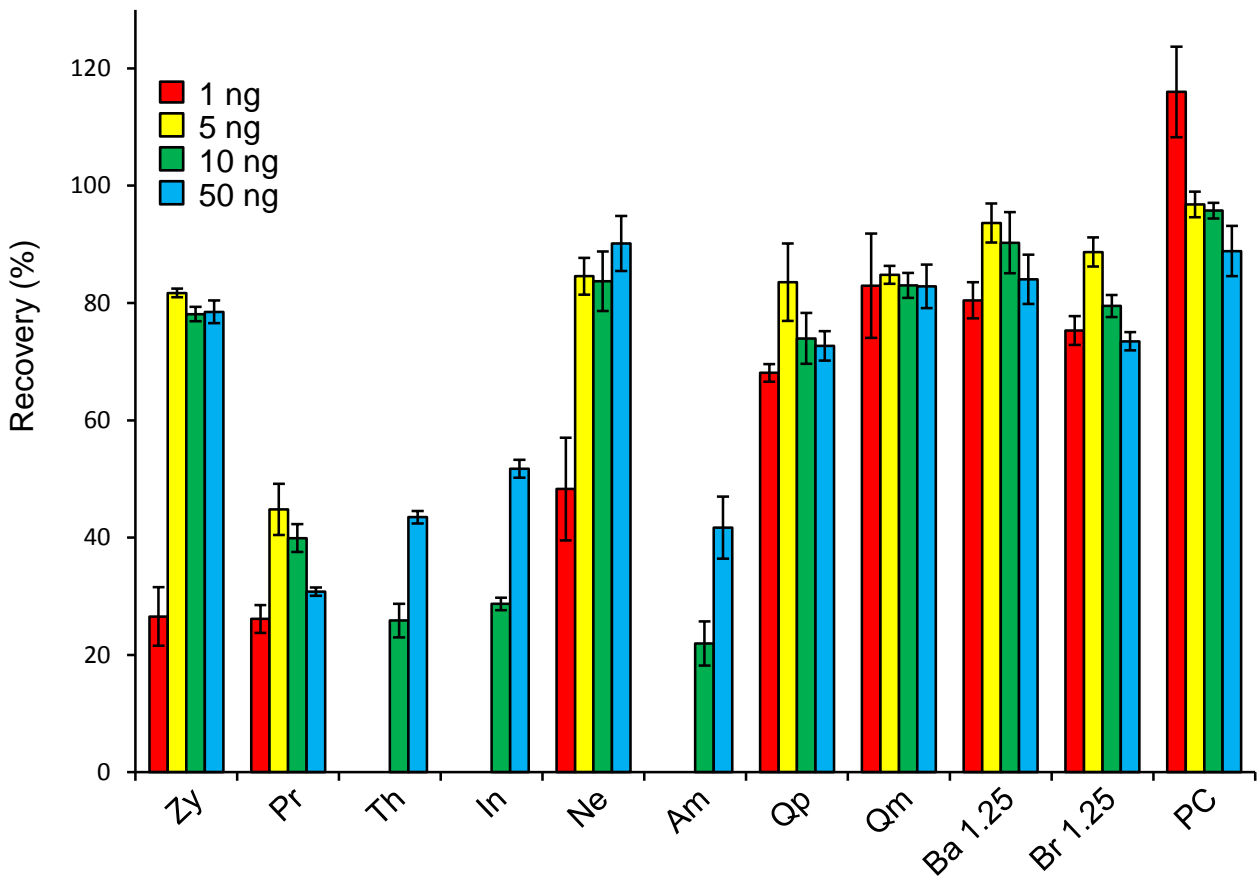

Supplement: 12864_2017_4371_MOESM1_ESM.pdf [file 12864_2017_4371_MOESM1_ESM.pdf]
