# Supplementary material for: Purification of nanogram-range immunoprecipitated DNA in ChIP-seq application
Source: PubMed Central journal article supplement (PMC5740926; doi:10.1186/s12864-017-4371-5), 2017-12-21
Supplement: 12864_2017_4371_MOESM2_ESM.pdf [file 12864_2017_4371_MOESM2_ESM.pdf]

## Additional file 2

### Microcentrifuge tubes tested in this study

| Tube name                                      | Commercial supplier | Capacity | Material                  | Max RCF  | Certifications/Compliance                                       |
|------------------------------------------------|---------------------|----------|---------------------------|----------|-----------------------------------------------------------------|
| MaxyClear Snaplock Microcentrifuge Tube        | Axygen              | 1.7 mL   | co-polymer /Polypropylene | 14000 xg | Certified RNase-/DNase-free Nonpyrogenic                        |
| DNA LoBind Snap Cap PCR Tube                   | Eppendorf           | 1.5 mL   | Polypropylene             | 30000 xg | DNA, DNase, RNase, PCR Inhibitors free                          |
| Siliconized Low-Retention Microcentrifuge Tube | Fisherbrand         | 1.5 mL   | Polypropylene             | 30000 xg | Critical applications where minute sample recovery is important |
| Premium Microcentrifuge Tube                   | Fisherbrand         | 1.5 mL   | Polypropylene             | 30000 xg | RNase, DNase-free                                               |
