# Supplementary material for: Purification of nanogram-range immunoprecipitated DNA in ChIP-seq application
Source: PubMed Central journal article supplement (PMC5740926; doi:10.1186/s12864-017-4371-5), 2017-12-21
Supplement: 12864_2017_4371_MOESM5_ESM.pdf [file 12864_2017_4371_MOESM5_ESM.pdf]

## Additional file 5

### Mapping results of ChIP-seq reads generated through different purification reagents <sup>[7]</sup>

| Library Name | Algorithm | Total # of Pairs | Total # Uniquely Mapped Pairs | Unique Pairs (%) | Complexity | Total Peaks | Duplicates (%) |
|--------------|-----------|------------------|-------------------------------|------------------|------------|-------------|----------------|
| Input        |           | 51,040,698       | 39,982,163                    | 78.50%           | 0.9349     |             | 6.51%          |
| St K4me3     | macs      | 42,913,066       | 33,584,141                    | 78.50%           | 0.9251     | 37,679      | 7.49%          |
| Qm K4me3     | macs      | 28,610,640       | 22,443,663                    | 78.70%           | 0.9158     | 34,228      | 8.42%          |
| Ne K4me3     | macs      | 24,329,553       | 19,232,263                    | 79.30%           | 0.8745     | 34,498      | 12.55%         |
| Zy K4me3     | macs      | 28,444,136       | 22,232,194                    | 78.40%           | 0.9330     | 34,923      | 6.70%          |
| Ba K4me3     | macs      | 29,818,138       | 23,595,325                    | 79.40%           | 0.9238     | 35,282      | 7.62%          |
| St K27me3    | sicer     | 41,332,165       | 33,133,641                    | 80.30%           | 0.9369     | 30,323      | 6.31%          |
| Qm K27me3    | sicer     | 30,060,890       | 23,524,187                    | 78.40%           | 0.9248     | 33,513      | 7.52%          |
| Ne K27me3    | sicer     | 33,067,413       | 26,534,649                    | 80.40%           | 0.9340     | 26,714      | 6.60%          |
| Zy K27me3    | sicer     | 31,501,790       | 25,243,738                    | 80.30%           | 0.9407     | 29,099      | 5.93%          |
| Ba K27me3    | sicer     | 25,693,025       | 20,581,001                    | 80.30%           | 0.9370     | 40,895      | 6.30%          |
