# Supplementary material for: Purification of nanogram-range immunoprecipitated DNA in ChIP-seq application
Source: PubMed Central journal article supplement (PMC5740926; doi:10.1186/s12864-017-4371-5), 2017-12-21
Supplement: 12864_2017_4371_MOESM8_ESM.pdf [file 12864_2017_4371_MOESM8_ESM.pdf]

## Additional file 8

### Overlapping percentage of peaks relative to ENCODE data

| Library Name | Total Peaks | Overlap | Un-overlap | % Overlap | % Un-overlap |
|--------------|-------------|---------|------------|-----------|--------------|
| St K4me3     | 37,679      | 22,471  | 15,208     | 59.64%    | 40.36%       |
| Qm K4me3     | 34,228      | 22,130  | 12,098     | 64.65%    | 35.35%       |
| Ne K4me3     | 34,498      | 22,546  | 11,952     | 65.35%    | 34.65%       |
| Zy K4me3     | 34,923      | 22,628  | 12,295     | 64.79%    | 35.21%       |
| Ba K4me3     | 35,282      | 22,238  | 13,044     | 63.03%    | 36.97%       |
| St K27me3    | 30,323      | 20,910  | 9,413      | 68.96%    | 31.04%       |
| Qm K27me3    | 33,513      | 24,414  | 9,099      | 72.85%    | 27.15%       |
| Ne K27me3    | 26,714      | 18,804  | 7,910      | 70.39%    | 29.61%       |
| Zy K27me3    | 29,099      | 20,415  | 8,684      | 70.16%    | 29.84%       |
| Ba K27me3    | 40,895      | 28,626  | 12,269     | 70.00%    | 30.00%       |

The ENCODE data from University of Washington was used for H3K4me3.

The ENCODE data from Broad institute was used for H3K27me3.
