# Supplementary material for: Purification of nanogram-range immunoprecipitated DNA in ChIP-seq application
Source: PubMed Central journal article supplement (PMC5740926; doi:10.1186/s12864-017-4371-5), 2017-12-21
Supplement: 12864_2017_4371_MOESM11_ESM.pdf [file 12864_2017_4371_MOESM11_ESM.pdf]

## Additional file 11

### Purification reagents tested in this study

| Kit name                          | Commercial supplier | Binding capacity | DNA size range   | Elution volume | Features            |
|-----------------------------------|---------------------|------------------|------------------|----------------|---------------------|
| ChIP DNA Clean & Concentrator     | Zymo                | Up to 5 µg       | 50 bp to ~ 23 kb | 6-100 µl       | Silica-based column |
| Wizard® SV Gel and PCR Clean-Up   | Promega             | 10 ng to 40 µg   | 100 bp to 10 kb  | 15-50 µl       | Silica-based column |
| GeneJET PCR Purification Kit      | Thermo Fisher       | Up to 25 µg      | 25 bp to 20 kb   | 10-50 µl       | Silica-based column |
| PureLink® PCR Purification Kit    | Invitrogen          | Up to 40 µg      | 100 bp to 12 kb  | 50 µl          | Silica-based column |
| Monarch® PCR & DNA Cleanup Kit    | New England Biolabs | Up to 5 µg       | ~50 bp to 25 kb  | 6–20 µl        | Silica-based column |
| Chromatin IP DNA Purification Kit | Active Motif        | 100 ng to 1 µg   | ≥~50 bp          | 10-150 µl      | Silica-based column |
| QIAquick PCR Purification Kit     | Qiagen              | 10 µg            | 100 bp to 10 kb  | > 30 µl        | Silica-based column |
| MinElute PCR Purification Kit     | Qiagen              | 5 µg             | 70 bp – 4 kb     | > 10 µl        | Silica-based column |
| Agencourt AMPure XP               | Beckman             | NA               | ≥~100 bp         | > 15 µl        | SPRI-based beads    |
| Agencourt RNAClean™ XP            | Beckman             | NA               | NA               | > 15 µl        | SPRI-based beads    |

NA: not available
